# Supplementary material for: White light phosphorescence from ZnO nanoparticles for white LED applications
Source: Royal Society of Chemistry journal article supplement (doi:10.1039/d2nj02684h), 2022-01-01

## White Light Phosphorescence from ZnO Nanoparticles for White LED Applications

Sagnik Das<sup>a</sup>, Uttam K Ghoraib, Rajib Dey<sup>c</sup>, Chandan K Ghosh<sup>c</sup>, Mrinal Pal<sup>a\*</sup>

a. CSIR-Central Glass and Ceramic Research Institute, Kolkata-700032, India;

b. Ramakrishna Mission Vidyamandira, Howrah-711202, India

c. Jadavpur University, Kolkata-700032, India

e-mail: [palm@cgcri.res.in](mailto:palm@cgcri.res.in)

### Electronic Supplementary Information

**ESI-Fig. S1:** FESEM images of BZ, BZR1, BZR2, BZR3, BZR4 and BZR5

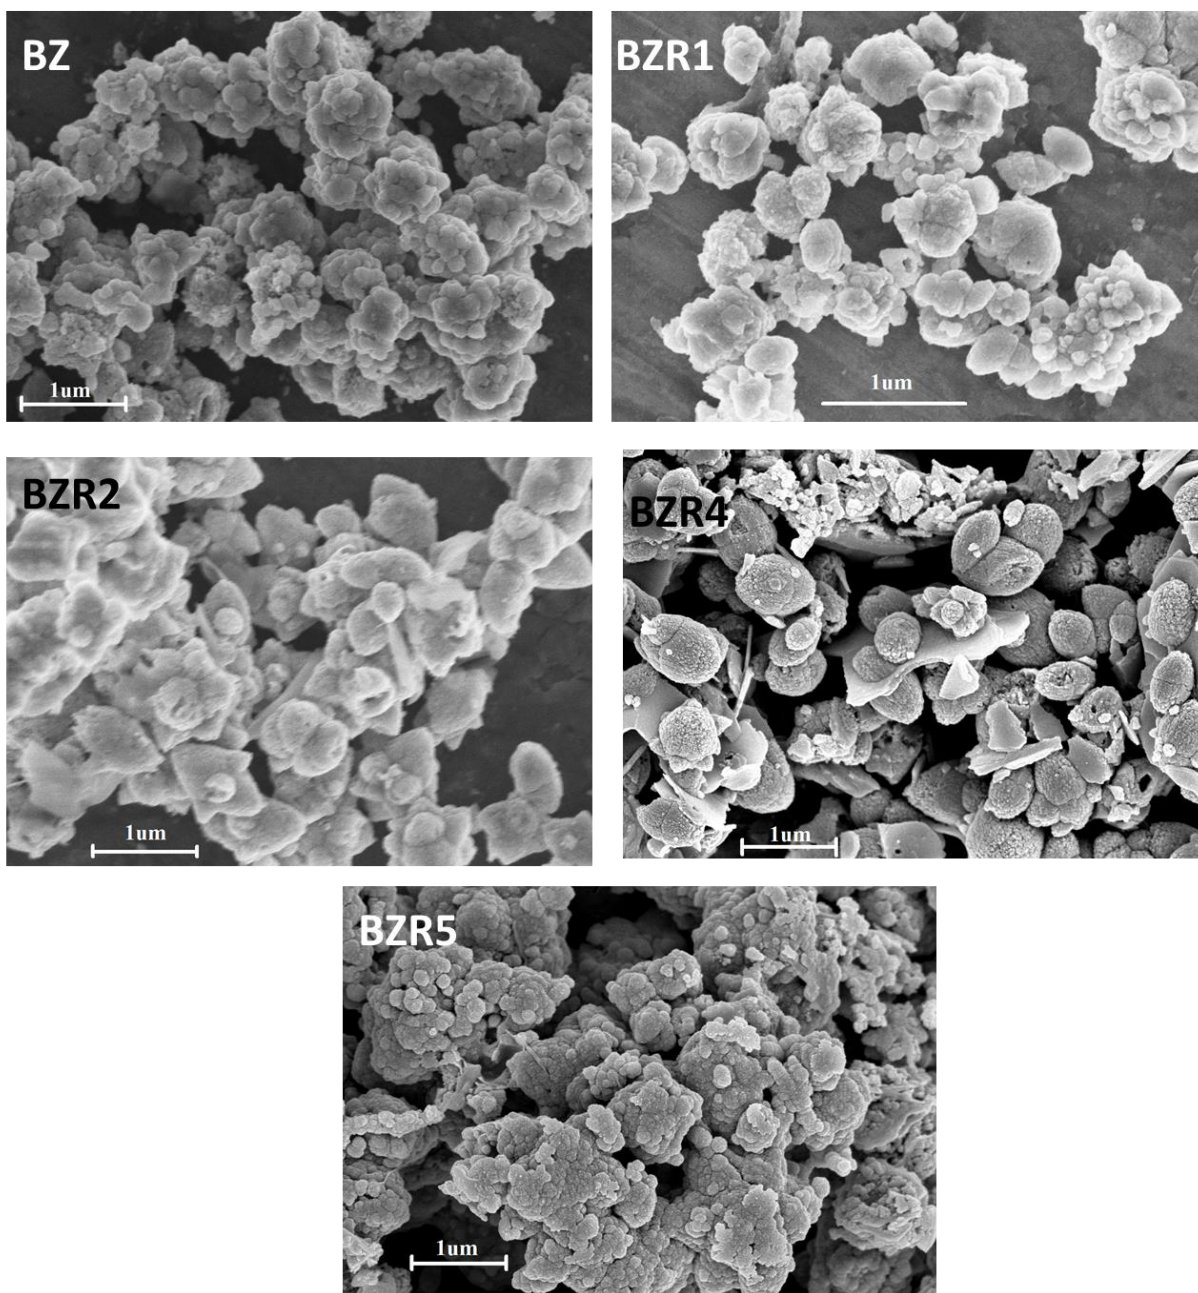

**ESI-Fig. S2:** Deconvoluted PL emissions of (a) BZ, (b) BZR1, (c) BZR2, (d) BZR4, (e) BZR5

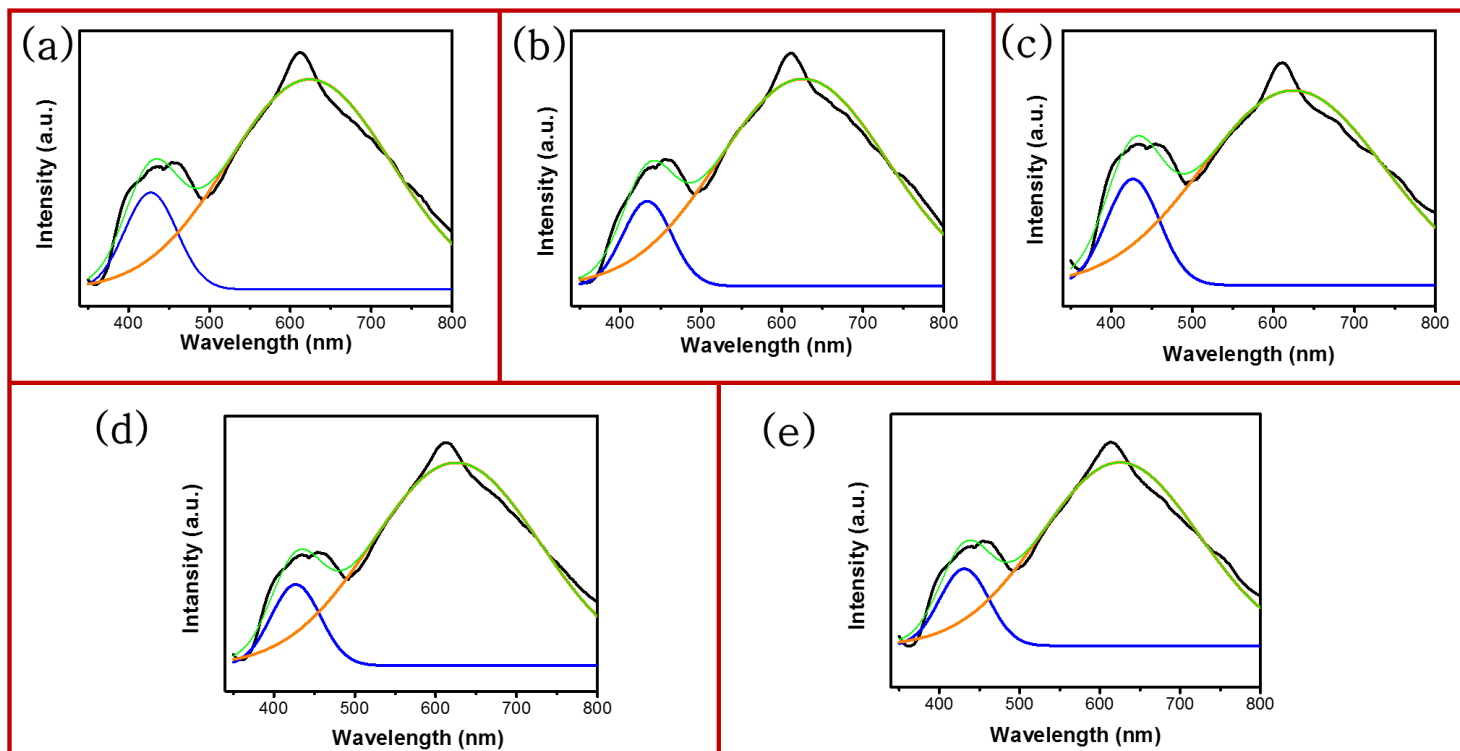

**ESI-Fig. S3:** CIE Plots of (a) BZ, (b) BZR1, (c) BZR2, (d) BZR3, (e) BZR4, (f)BZR5

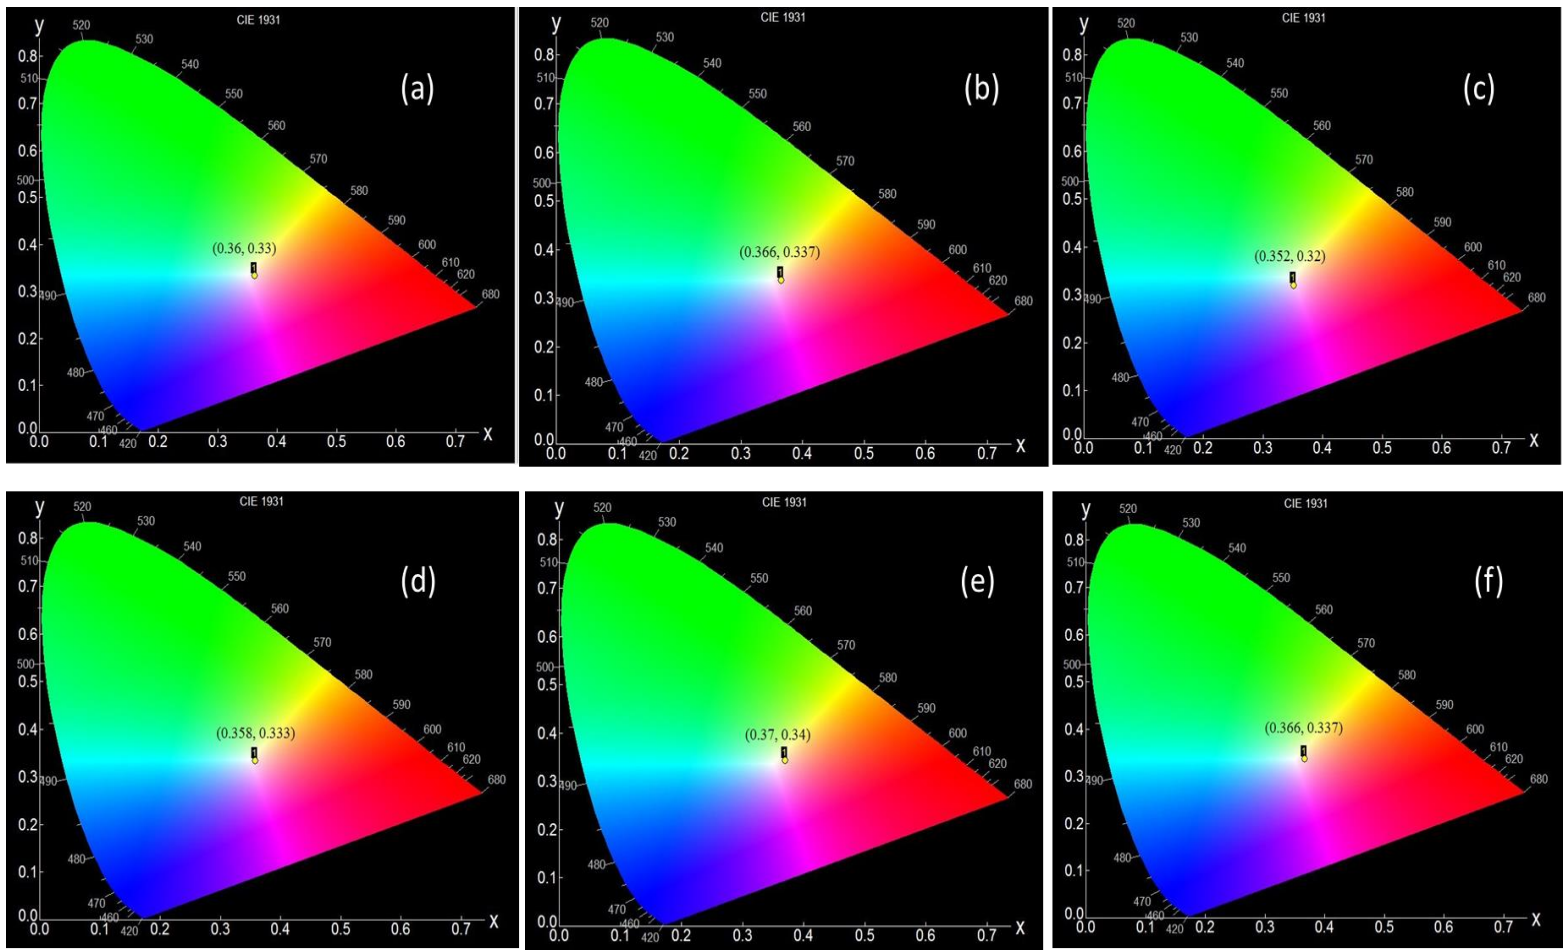

Supplement: d2nj02684h1.pdf [file d2nj02684h1.pdf]
